# Supplementary material for: Prevalence and predictors of alcohol use during pregnancy: findings from international multicentre cohort studies
Source: HighWire-hosted journal article supplement (doi:10.1136/bmjopen-2014-006323), 2015-05-01
Supplement: bmjopen-2014-006323supp.pdf [file bmjopen-2014-006323supp.pdf]

## Prevalence and predictors of alcohol use during pregnancy: findings from international multi-centre cohort studies

Linda M O’Keeffe<sup>1,2</sup>, Patricia M Kearney<sup>2</sup>, Fergus P McCarthy<sup>3</sup>, Ali S Khashan<sup>2,3</sup>, Richard A Greene<sup>1</sup>, Robyn A North<sup>4</sup>, Lucilla Poston<sup>4</sup>, Lesley M E McCowan<sup>5</sup>, Philip N Baker<sup>6</sup>, Gus A Dekker<sup>7</sup>, James J Walker<sup>8</sup>, Rennae Taylor<sup>5</sup> Louise C Kenny<sup>3</sup>

- 1 National Perinatal Epidemiology Centre, Cork University Maternity Hospital, Wilton, Cork, Ireland
- 2 Department of Epidemiology and Public Health, University College Cork, Ireland
- 2 The Irish Centre for Fetal and Neonatal Translational Research (INFANT), Department of Obstetrics and Gynecology, University College Cork, Ireland
- 4 Division of Women’s Health, Women’s Health Academic Centre, King’s College London, and King’s Health Partners, London WC2R2LS, United Kingdom.
- 5 Department of Obstetrics and Gynaecology, South Auckland Clinical School, Faculty of Medical and Health Sciences, University of Auckland, Auckland 1142, New Zealand.
- 6 National Centre for Growth & Development and Maternal and Fetal Health, Liggins Institute, University of Auckland, Auckland District Health Board and Counties Manukau District Health Board, Auckland 1142, New Zealand
- 7 Women's and Children's Division Lyell McEwin Hospital, University of Adelaide, Adelaide, South Australia 5112
- 8 St James University Hospital, Leeds LS97TF, United Kingdom

**Corresponding Author:** Linda M O’Keeffe, National Perinatal Epidemiology Centre, 5<sup>th</sup> Floor, Cork University Maternity Hospital, Cork, Ireland.

**Email:** [lindaokeeffe1987@gmail.com](mailto:lindaokeeffe1987@gmail.com)

**Phone:** 00353877950417

**Supplementary Table 1**

|                                               |           | <b>GUI</b><br><b>N=10,953</b><br><b>N (%)</b> | <b>SCOPE Ireland</b><br><b>N=1,766</b><br><b>N (%)</b> | <b>PRAMS</b><br><b>N=718</b><br><b>N (%)</b> |
|-----------------------------------------------|-----------|-----------------------------------------------|--------------------------------------------------------|----------------------------------------------|
| <b>Age</b>                                    |           |                                               |                                                        |                                              |
|                                               | <20       | 198 (2)                                       | 38 (2)                                                 | 4 (1)                                        |
|                                               | 20-24     | 1053 (10)                                     | 167 (10)                                               | 24 (3)                                       |
|                                               | 25-29     | 2311 (21)                                     | 543 (31)                                               | 139 (19)                                     |
|                                               | 30-39     | 6688 (61)                                     | 996 (56)                                               | 510 (71)                                     |
|                                               | >40       | 703 (6)                                       | 22 (1)                                                 | 40 (6)                                       |
| <b>Education</b>                              |           |                                               |                                                        |                                              |
|                                               | Secondary | 4836 (44)                                     | 197 (11)                                               | 126 (18)                                     |
|                                               | Tertiary  | 6110 (56)                                     | 1569 (89)                                              | 587 (82)                                     |
| <b>Ethnicity</b>                              |           |                                               |                                                        |                                              |
|                                               | Caucasian | 10207 (93)                                    | 1725 (98)                                              | 676 (95)                                     |
|                                               | Other     | 708 (7)                                       | 41 (2)                                                 | 43 (5)                                       |
| <b>Marital status</b>                         |           |                                               |                                                        |                                              |
|                                               | Married   | 7796 (71)                                     | 1578 (89)                                              | 670 (93)                                     |
|                                               | Single    | 3157 (29)                                     | 188 (11)                                               | 47 (7)                                       |
| <b>Parity</b>                                 |           |                                               |                                                        |                                              |
|                                               | 0         | 4288 (39)                                     | 1766 (100)                                             | 282 (40)                                     |
|                                               | 1+        | 6725 (61)                                     | -                                                      | 430 (60)                                     |
| <b>Smoking</b>                                |           | 1831 (17)                                     | 485 (28)                                               | 143 (23)                                     |
| <b>BMI (kg/m<sup>2</sup>)</b>                 |           |                                               |                                                        |                                              |
|                                               | <18.5     | 289 (3)                                       | 21 (1)                                                 | 26 (4)                                       |
|                                               | 18.5-24.9 | 5372 (51)                                     | 1034 (59)                                              | 464 (67)                                     |
|                                               | 25.0-29.9 | 3085 (30)                                     | 493 (28)                                               | 151 (22)                                     |
|                                               | >30       | 1677 (16)                                     | 218 (12)                                               | 51 (7)                                       |
| <b>Preterm birth [&lt;37 weeks gestation]</b> |           | 721 (7)                                       | 86 (5)                                                 | 39 (6)                                       |
| <b>Birth weight [&lt;2500g]</b>               |           | 606 (6)                                       | 75 (4)                                                 | 38 (5)                                       |
